# Supplementary material
Source: PubMed Central journal article supplement (PMC5454507)
Supplement: 10.1194_M074278_jlr.M074278-1.pdf [file 10.1194_M074278_jlr.M074278-1.pdf]

## SUPPLEMENTAL MATERIAL

Supplemental Table S1: Composition of Test Diets

| Ingredients (%)                            | Saturated fat diet | Unsaturated fat diet | Trans fat diet |
|--------------------------------------------|--------------------|----------------------|----------------|
| Cocoa Butter                               | <b>23.3060</b>     | 0                    | 0              |
| Canola Oil                                 | 0                  | <b>13.2265</b>       | 0              |
| Palm Olein Oil                             | 0                  | <b>7.8536</b>        | 0              |
| Hydrogenated Soy Oil                       | 0                  | 0                    | <b>21.0800</b> |
| Casein- Vitamin Tested                     | 23.3060            | 23.3059              | 23.3060        |
| Sucrose                                    | 19.7090            | 19.7090              | 19.7090        |
| Maltodextrin                               | 11.6530            | 11.6530              | 11.6530        |
| Dextrin                                    | 8.4830             | 8.4830               | 8.4830         |
| Powdered Cellulose                         | 5.8270             | 5.8270               | 5.8270         |
| Soybean Oil                                | 2.9200             | 2.9200               | 2.9200         |
| Potassium Citrate, Tribasic<br>Monohydrate | 1.9230             | 1.9230               | 1.9230         |
| Calcium Phosphate                          | 1.5150             | 1.5150               | 1.5150         |
| AIN-76A Vitamin Mix                        | 1.1650             | 1.1650               | 1.1650         |
| DIO Mineral Mix                            | 1.1650             | 1.1650               | 1.1650         |
| Calcium Carbonate                          | 0.6410             | 0.6410               | 0.6410         |
| L-Cystine                                  | 0.3500             | 0.3500               | 0.3500         |
| Choline Bitartate                          | 0.2330             | 0.2330               | 0.2330         |
| FD&C Yellow 6 Lake (Orange)                | 0.0300             | 0.0300               | 0.0300         |

Supplemental Table S2: Primer sequences of genes

| Genes        | Forward primer         | Reverse primer          |
|--------------|------------------------|-------------------------|
| m36B4        | ATGGGTACAAGCGCGTCCTG   | GCCTTGACCTTTTCAGTAAG    |
| mGrp78(BIP)  | AGGACAAGAAGGAGGATGTGGG | ACCGAAGGGTCATTCCAAGTG   |
| mGrp94       | AAACGGCAACACTTCGGTCAG  | GCATCCATCTCTTCTCCCTCATC |
| mXbp1        | GCAGCAAGTGGTGGATTTGG   | AGATGTTCTGGGGAGGTGACAAC |
| mXbp1s       | GAGTCCGCAGCAGGTG       | GTGTCAGAGTCCATGGGA      |
| mDdit3       | CTGGAAGCCTGGTATGAGGAT  | CAGGGTCAAGAGTAGTGAAGGT  |
| mDdi4        | CAAGGCAAGAGCTGCCATAG   | CCGGTACTTAGCGTCAGGG     |
| mGdf15       | CTGGCAATGCCTGAACAACG   | GGTCGGGACTTGGTTCTGAG    |
| mCxcl2       | CCAACCACCAGGCTACAGG    | GCGTCACACTCAAGCTCTG     |
| mPtgs2       | TTCAACACACTCTATCACTGGC | AGAAGCGTTTGCGGTACTCAT   |
| mErn1        | ACACCGACCACCGTATCTCA   | CTCAGGATAATGGTAGCCATGTC |
| mHerpud1     | CCTGGCTTCTCTGGCTACAC   | GTCGGGACAAAAGTTCCTGA    |
| mHaptoglobin | GCTATGTGGAGCACTTGGTTC  | CACCCATTGCTTCTCGTCGTT   |
| mLipocalin2  | TGGAAGAACCAAGGAGCTGT   | GGTGGGGACAGAGAAGATGA    |
| mSAA2        | GCGAGCCTACACTGACATGA   | TTTTCTCAGCAGCCCAGACT    |
| mTNFa        | CTTCCATCCAGTTGCCTTCTTG | AATTAAGCCTCCGACTTGTGAAG |
| mIL6         | CAACCTCCTCTCTGCCGTCAA  | TGACTCCAAAGTAGACCTGCCC  |
| mCD68        | CCAATTCAGGGTGGAAGAAA   | CTCGGGCTCTGATGTAGGTC    |

Supplemental Table S3: Detailed fatty acid profile of diets

| Fatty acids               | Saturated (%) | Cis-Unsaturated (%) | Trans-Unsaturated (%) |
|---------------------------|---------------|---------------------|-----------------------|
| C 14:0                    | 0.18          | 0.44                | 0.14                  |
| C 14:1 9t                 | 0             | 0                   | 0                     |
| C 14:1 9c                 | 0             | 0                   | 0                     |
| C 16:0                    | 23.76         | 16.16               | 11.01                 |
| C 16:1 9t                 | 0             | 0                   | 0                     |
| C 16:1 9c                 | 0.18          | 0.26                | 0                     |
| C 17:0                    | 0.28          | 0                   | 0.17                  |
| C 17:1 10c                | 0             | 0                   | 0                     |
| C 18:0                    | 31.59         | 2.99                | 8.23                  |
| C 18:1 7+8t               | 0.11          | 0                   | 4.28                  |
| C 18:1 9t                 | 0             | 0.11                | 3.33                  |
| C 18:1 11t                | 0             | 0                   | 6.66                  |
| C 18:1 5c+7c+12t          | 0             | 0                   | 5.03                  |
| C 18:1 9c+13t             | 30.98         | 49.24               | 23.84                 |
| C 18:1 11c+15t            | 0.87          | 2.54                | 2.05                  |
| C 18:1 12c                | 0             | 0.23                | 6.85                  |
| C 18:1 13c                | 0             | 0.10                | 0.91                  |
| C 18:1 15c                | 0             | 0                   | 0.65                  |
| C 18:2 tt                 | 0             | 0                   | 0.78                  |
| C 18:2 ct                 | 0             | 0.19                | 0                     |
| C 18:2 tc                 | 0             | 0.11                | 0                     |
| C 18:2 cc                 | 9.67          | 19.96               | 7.56                  |
| C 18:3 ttt                | 0             | 0                   | 0                     |
| C 20:0                    | 1.10          | 0.55                | 0.31                  |
| C 18:3 tct                | 0             | 0                   | 0                     |
| C 18:3 ctt                | 0             | 0                   | 0                     |
| C 18:3 ctc                | 0             | 0.09                | 0                     |
| C 18:3 tcc                | 0             | 0.19                | 0                     |
| C 18:3 ccc                | 1.16          | 5.03                | 1.00                  |
| C 20:1 11c                | 0             | 0.84                | 0.21                  |
| Unspecified cis/trans     | 0             | 0                   | 11.01                 |
| Other unknown fatty acids | 0.14          | 1.04                | 6.03                  |

Supplemental Table S4: Overview of clinical observations in *Angptl4*<sup>-/-</sup> mice fed the different diets

|                      | <u>Saturated fat</u> | <u>Unsaturated fat</u> | <u>Trans fat</u> |
|----------------------|----------------------|------------------------|------------------|
| Touton giant cells   | Yes (6/7)            | No (0/5)               | Yes (9/13)       |
| Enlarged lymph nodes | Yes, massive         | Yes, slightly          | Yes, slightly    |
| SAA elevated         | Yes                  | No                     | No               |
| Chylous ascites      | Yes                  | No                     | No               |
| Weight loss          | Yes                  | No                     | No               |
